# Supplementary figures and images for: Rapid Determination of Major Compounds in the Ethanol Extract of Geopropolis from Malaysian Stingless Bees, Heterotrigona itama, by UHPLC-Q-TOF/MS and NMR
Source: MDPI journal article supplement (doi:10.3390/molecules22111935), 2017-11-10

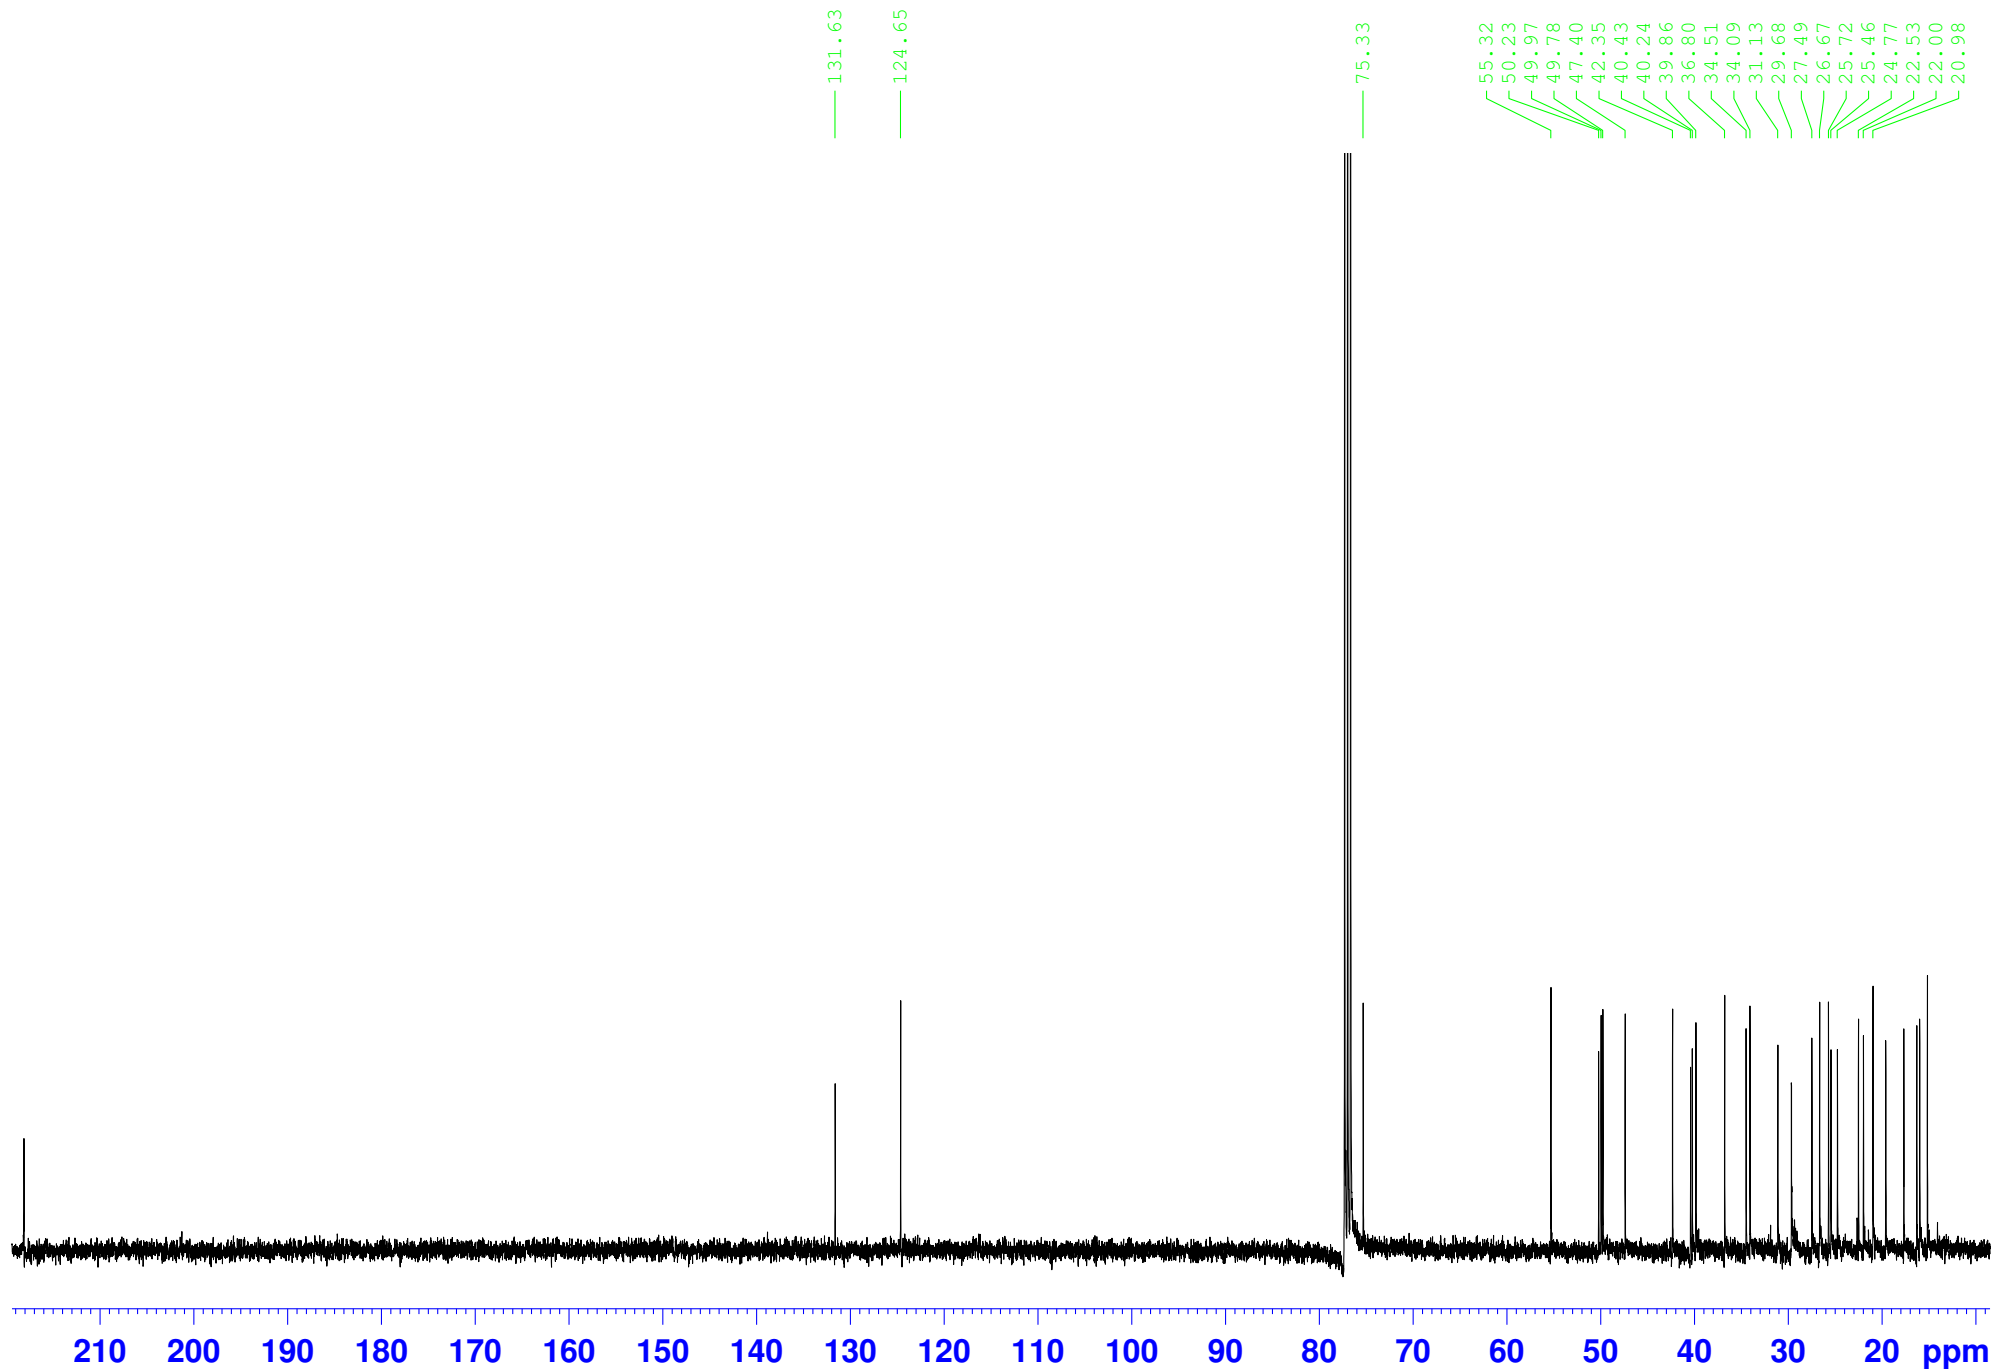

Supplement: s1 [file s1]

H1 2

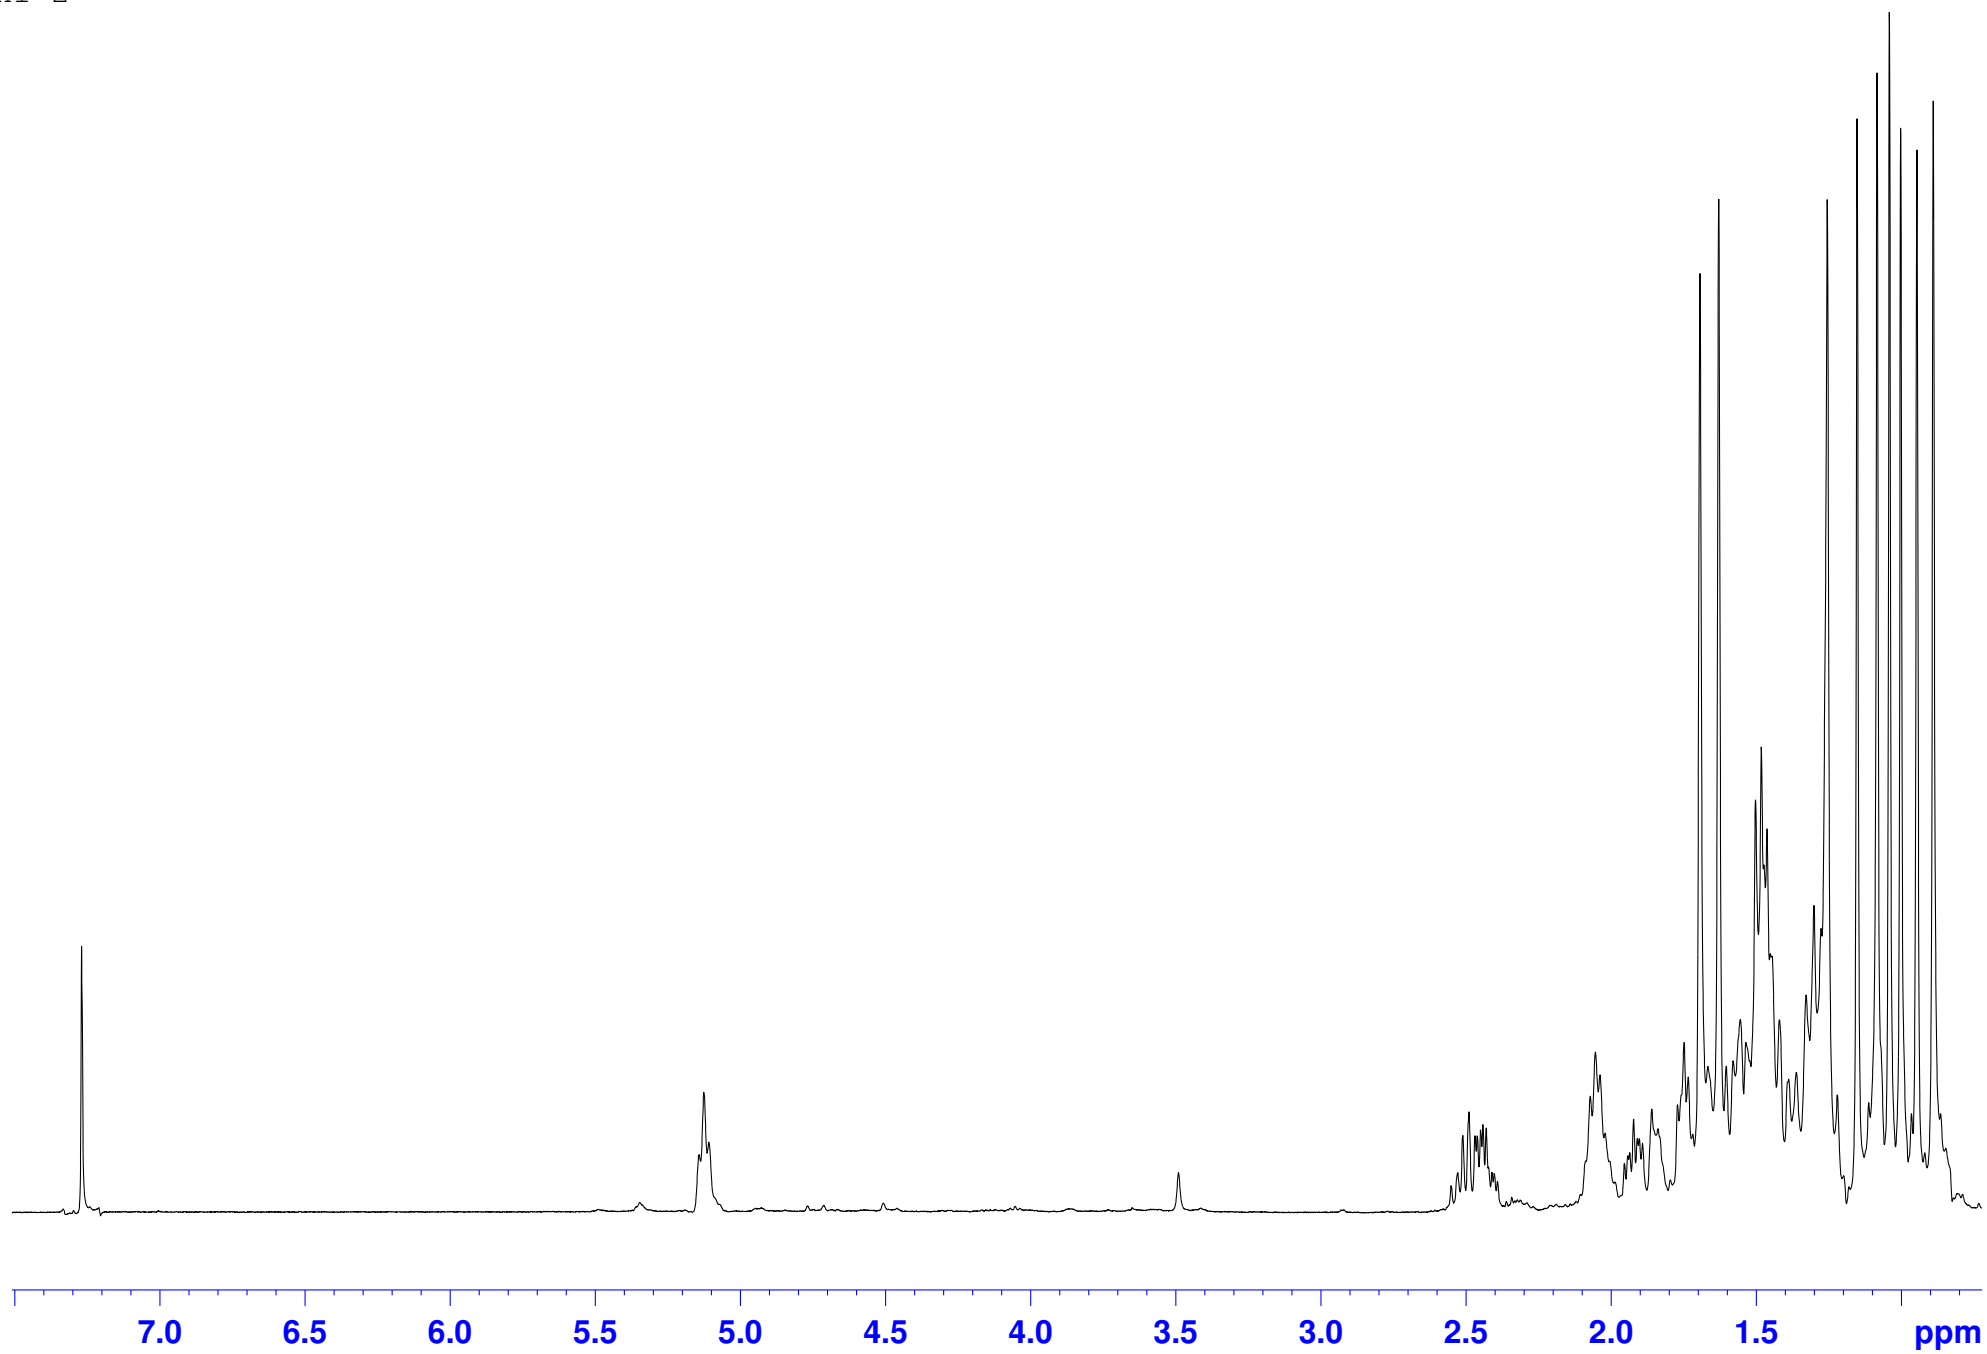

Supplement: s1 [file s1]

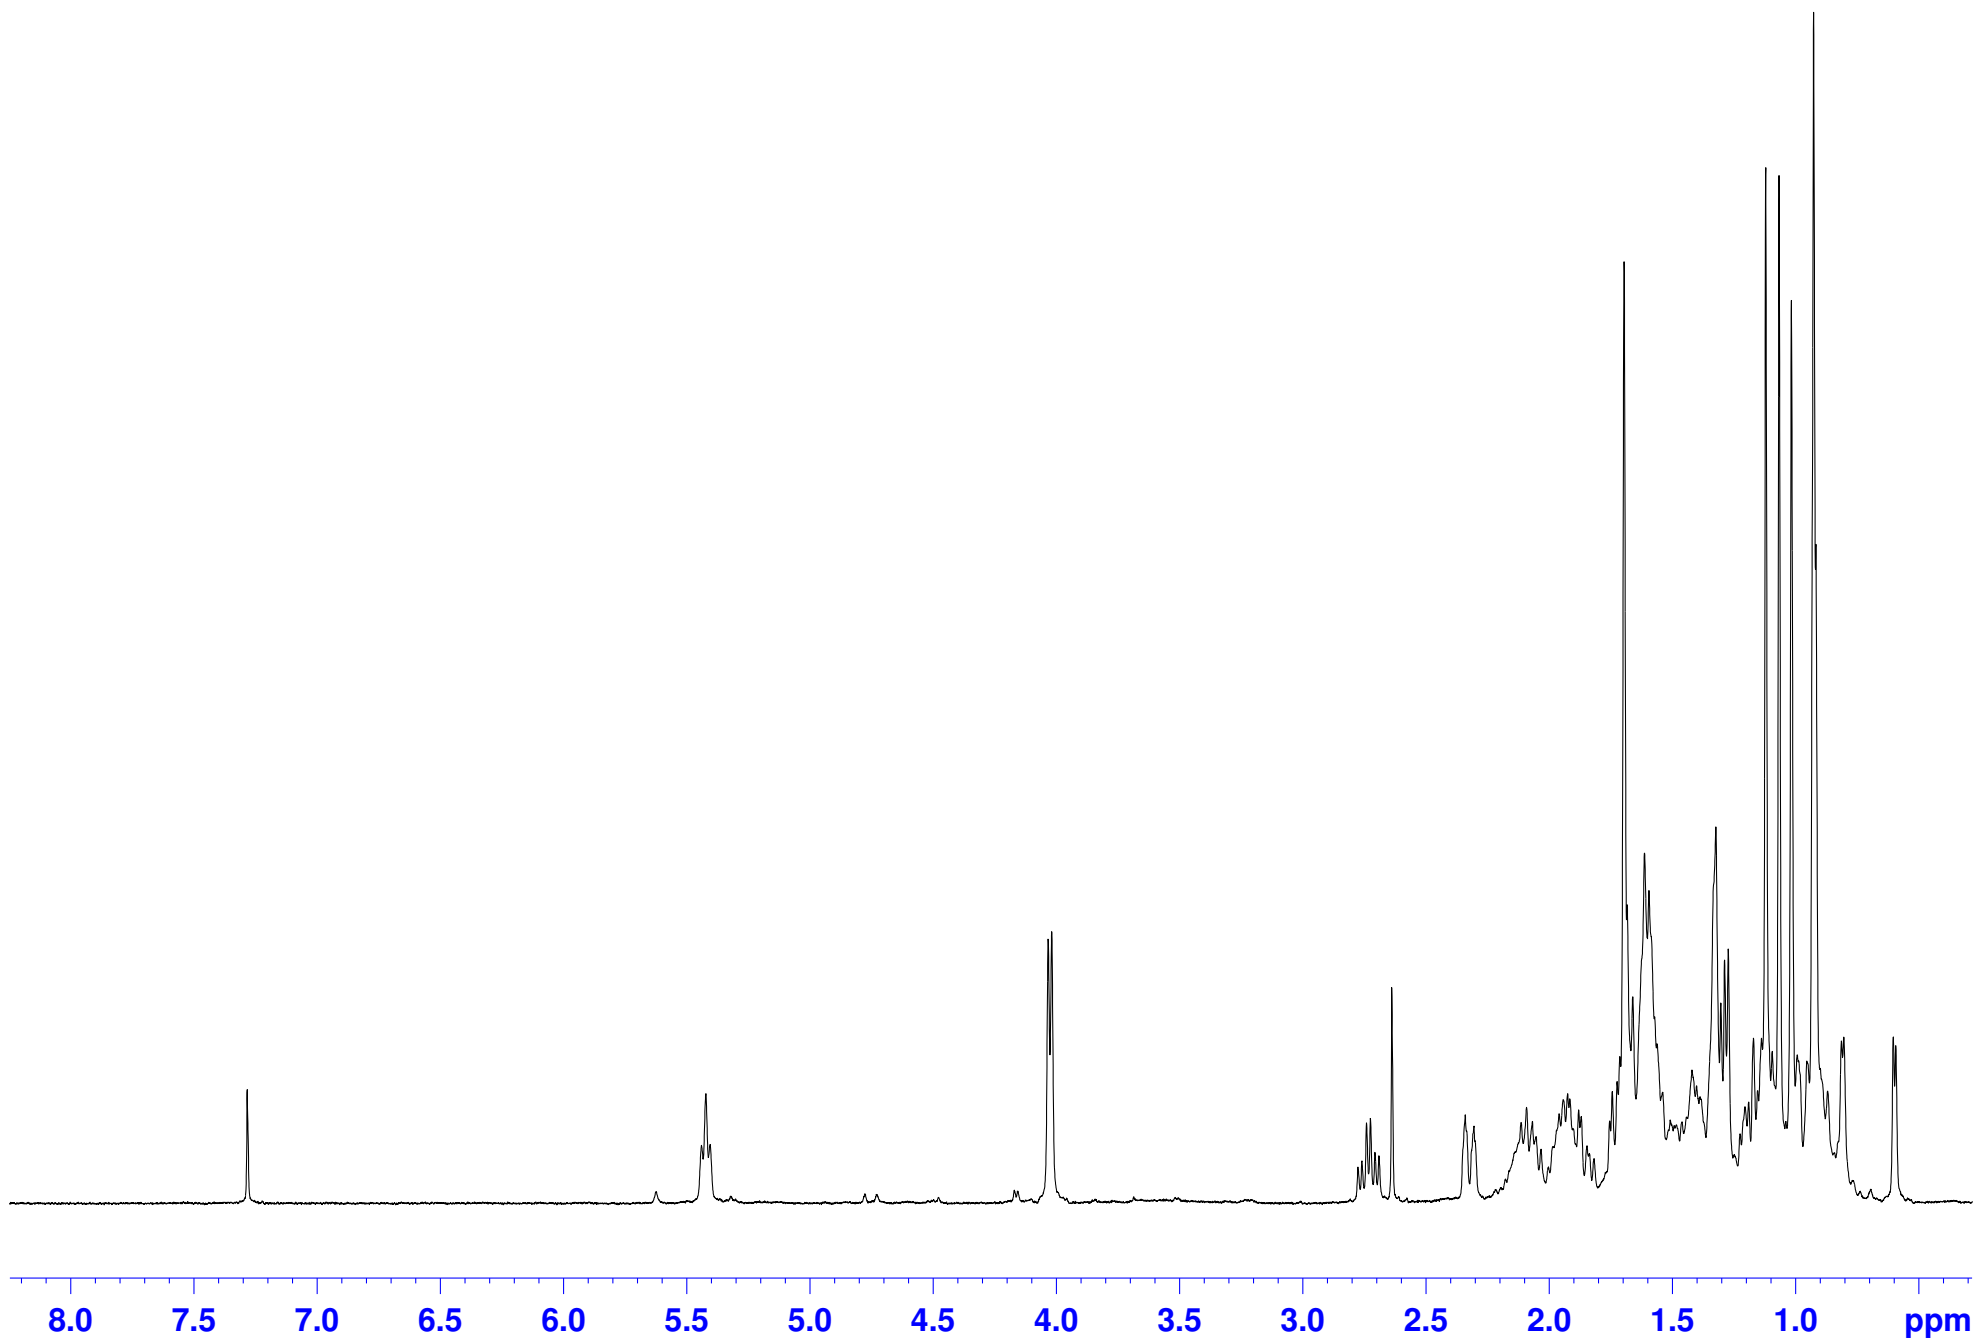

Supplement: s1 [file s1]

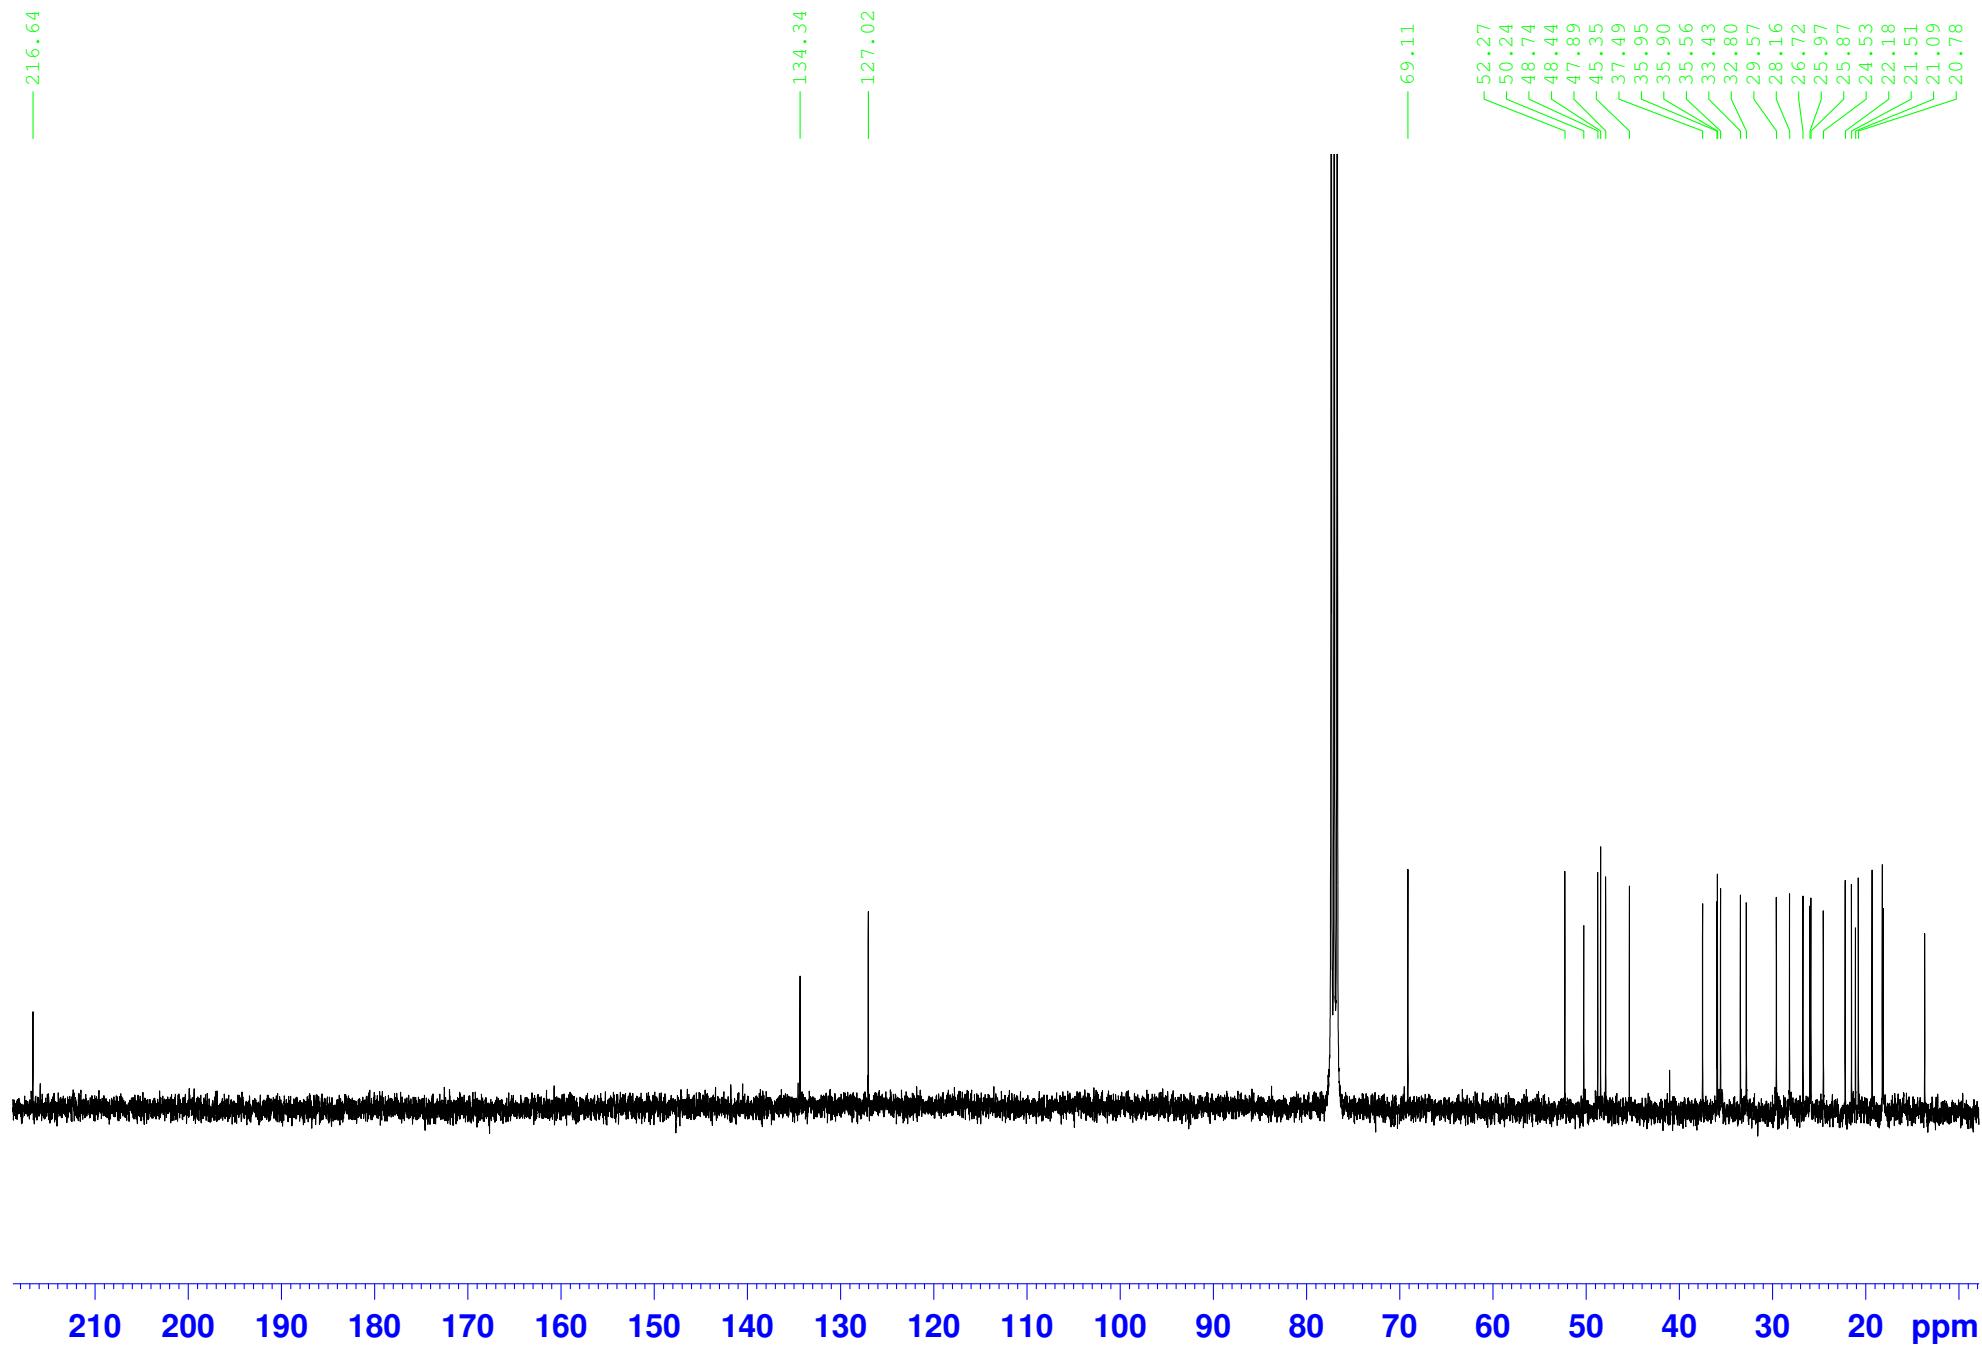

Supplement: s1 [file s1]
